# Supplementary material
Source: PubMed Central journal article supplement (PMC11115675)

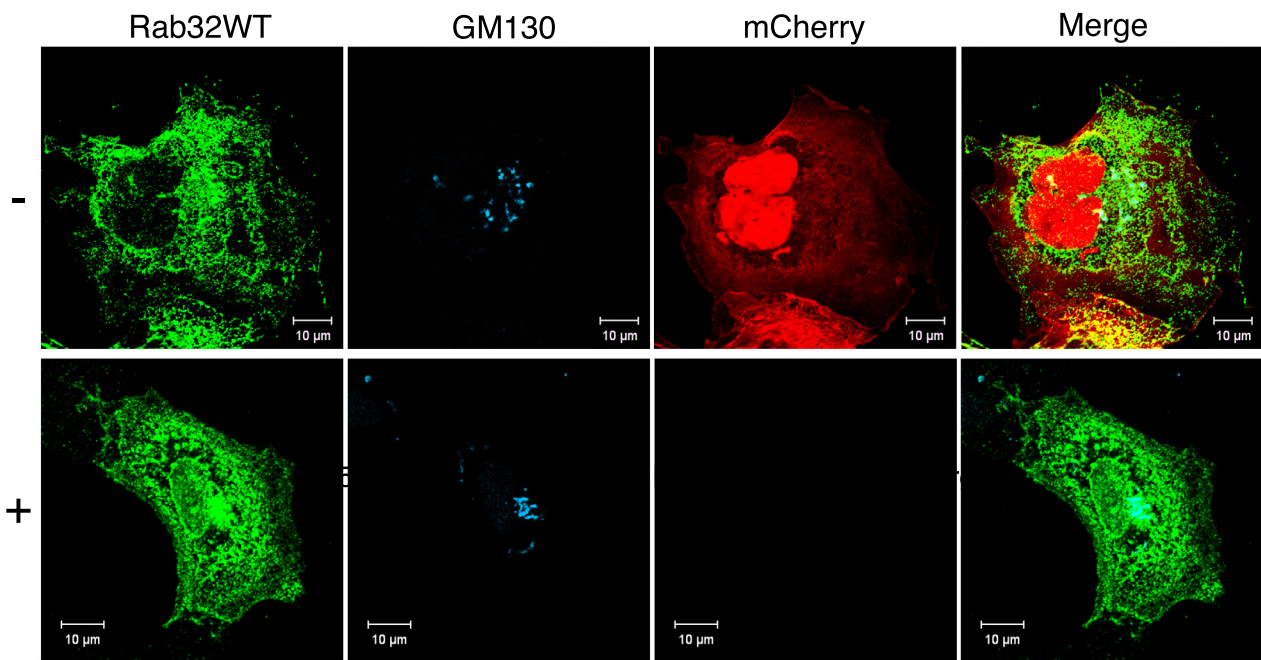

Supplemental Figure 1 Hirota et al.

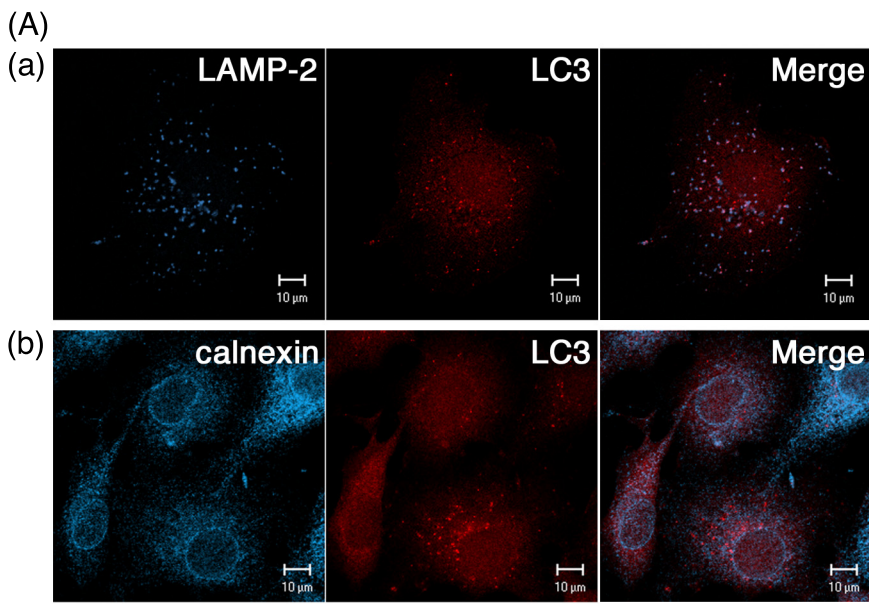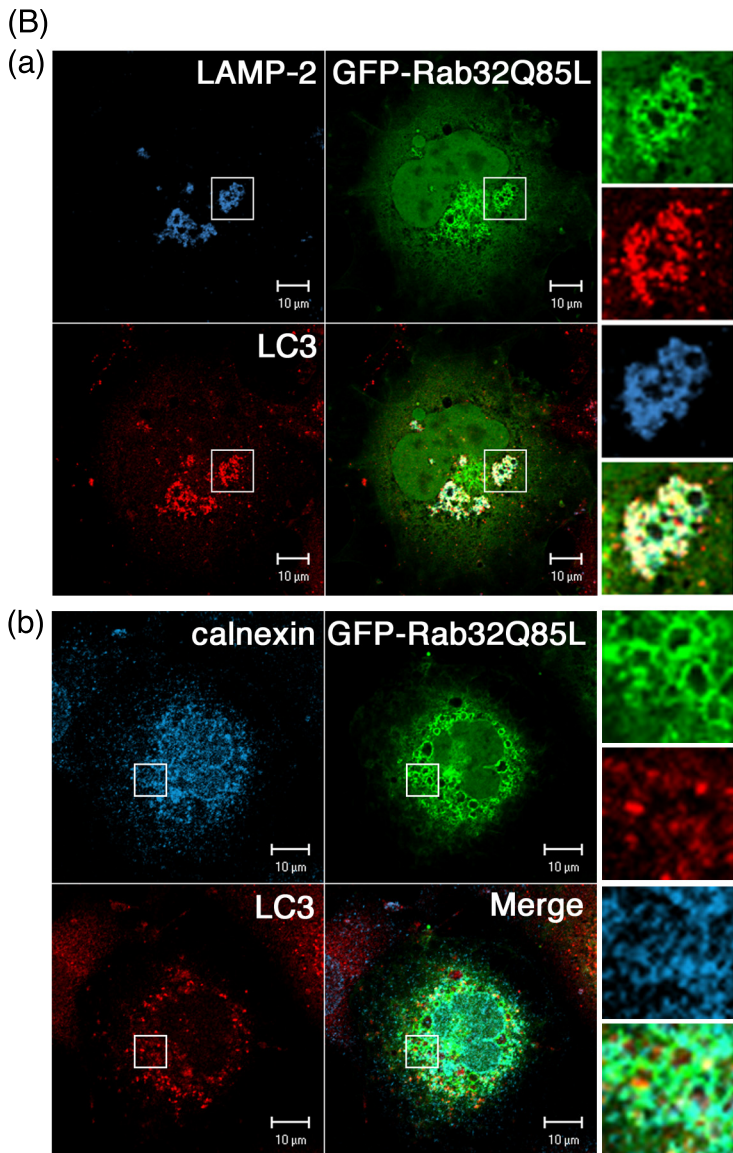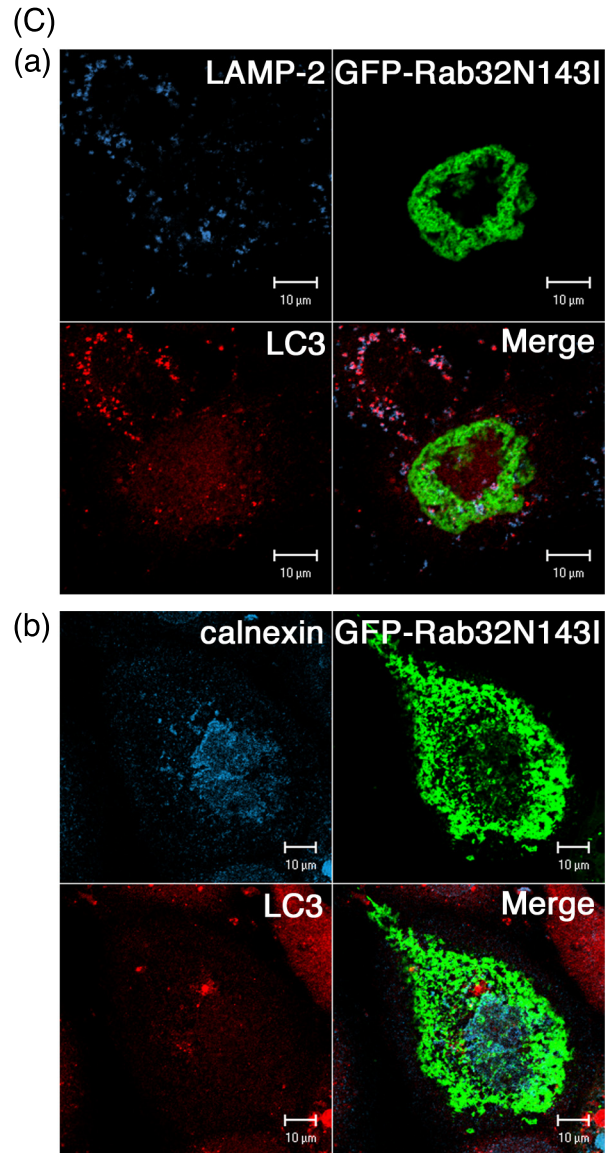

Supplemental Figure 2 Hirota et al.

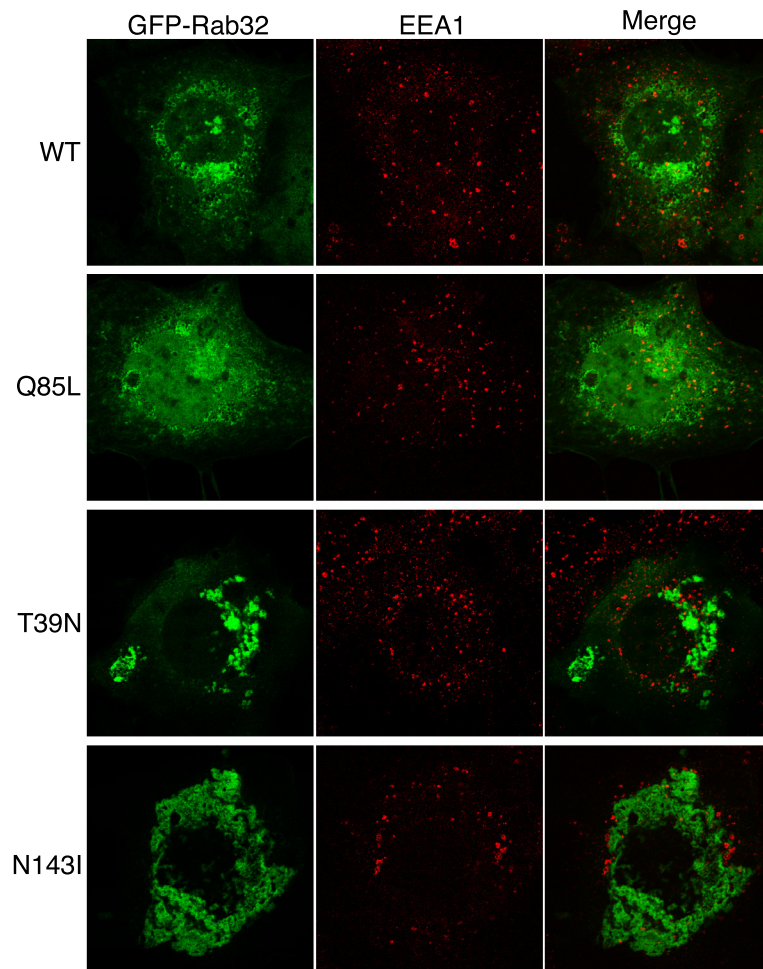

Supplemental Figure 3 Hirota et al.

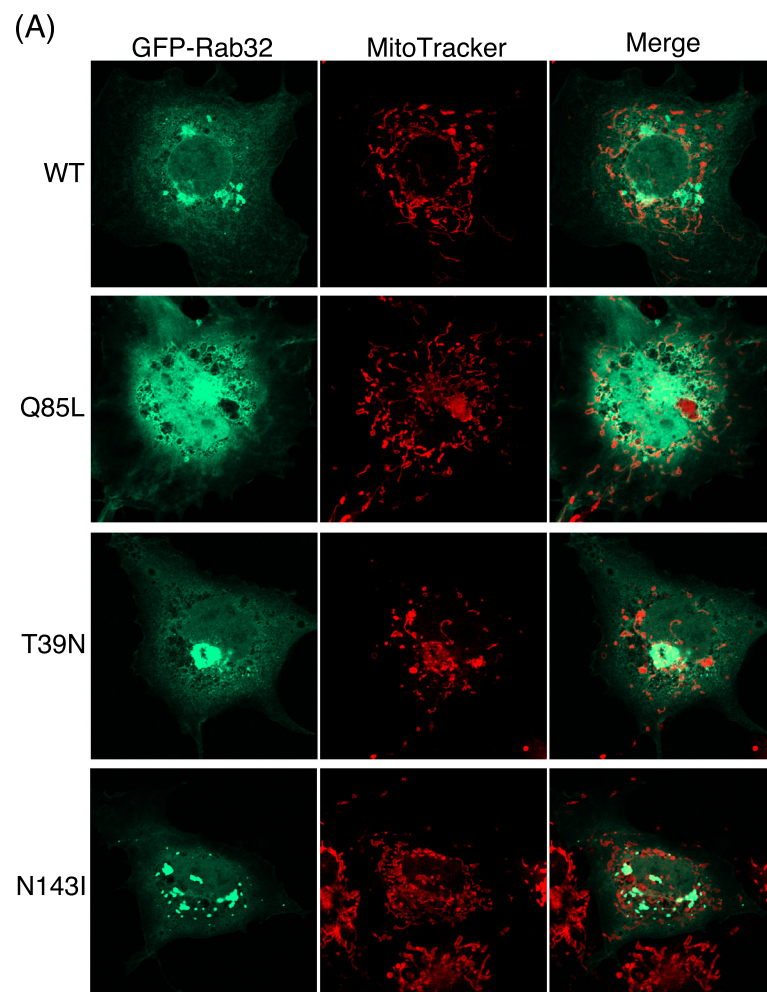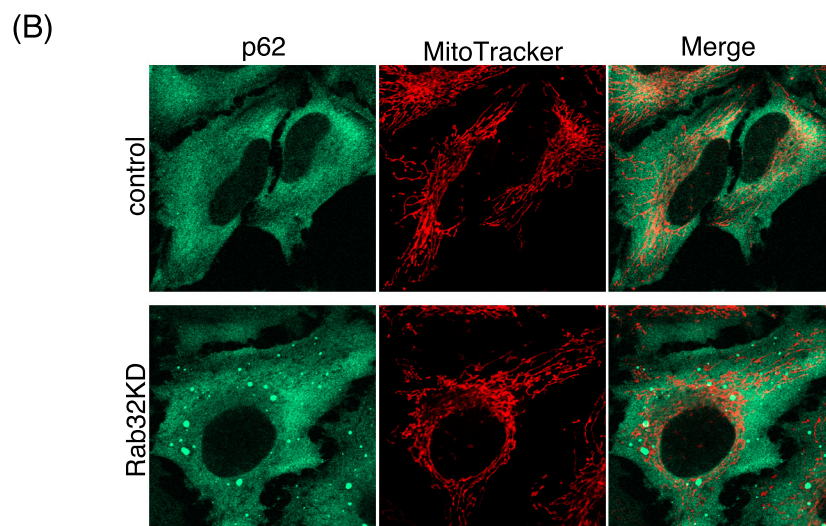

Supplemental Figure 4 Hirota et al.

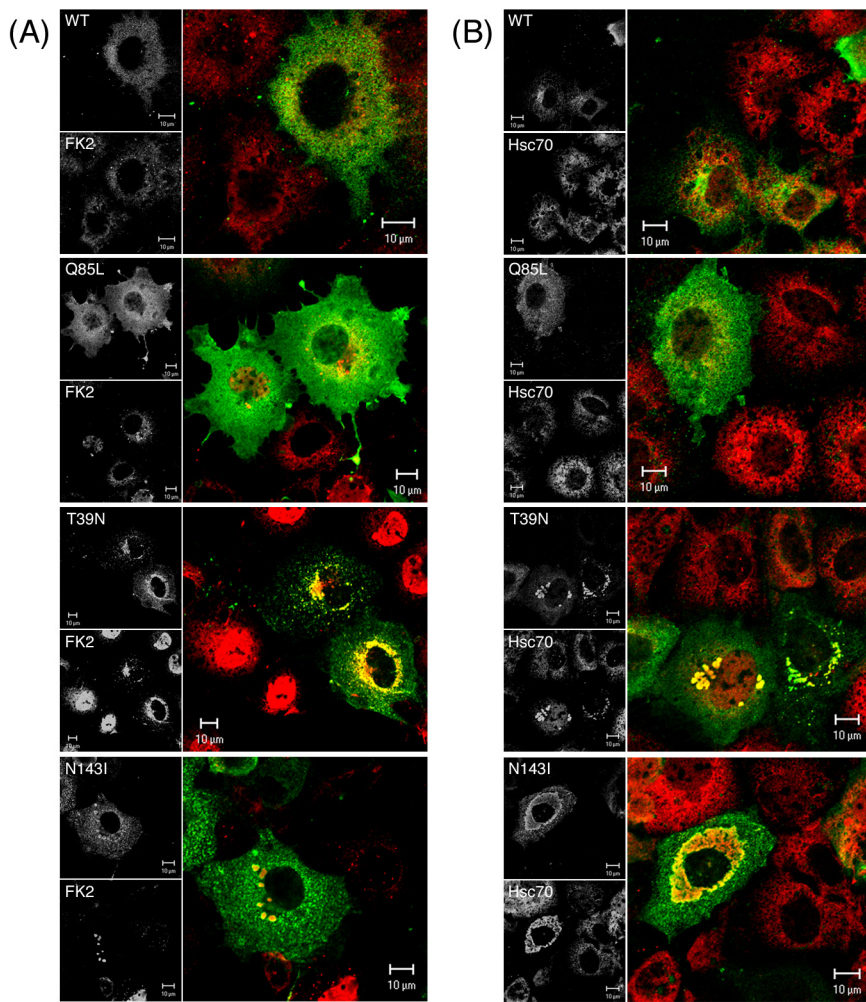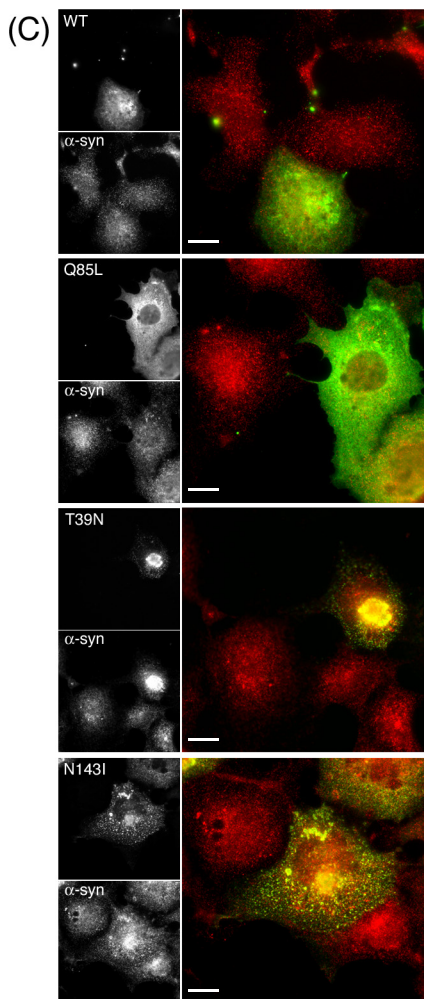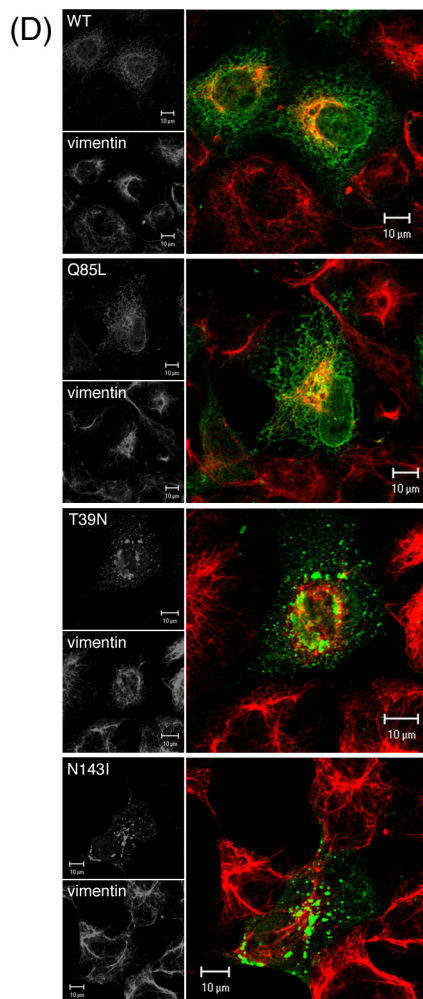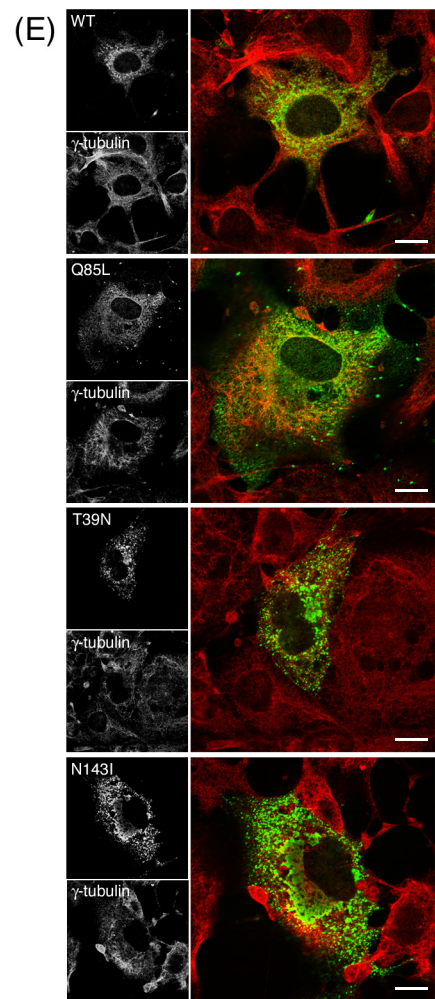

Supplemental Figure 5A - 5E Hirota et al.

(F)

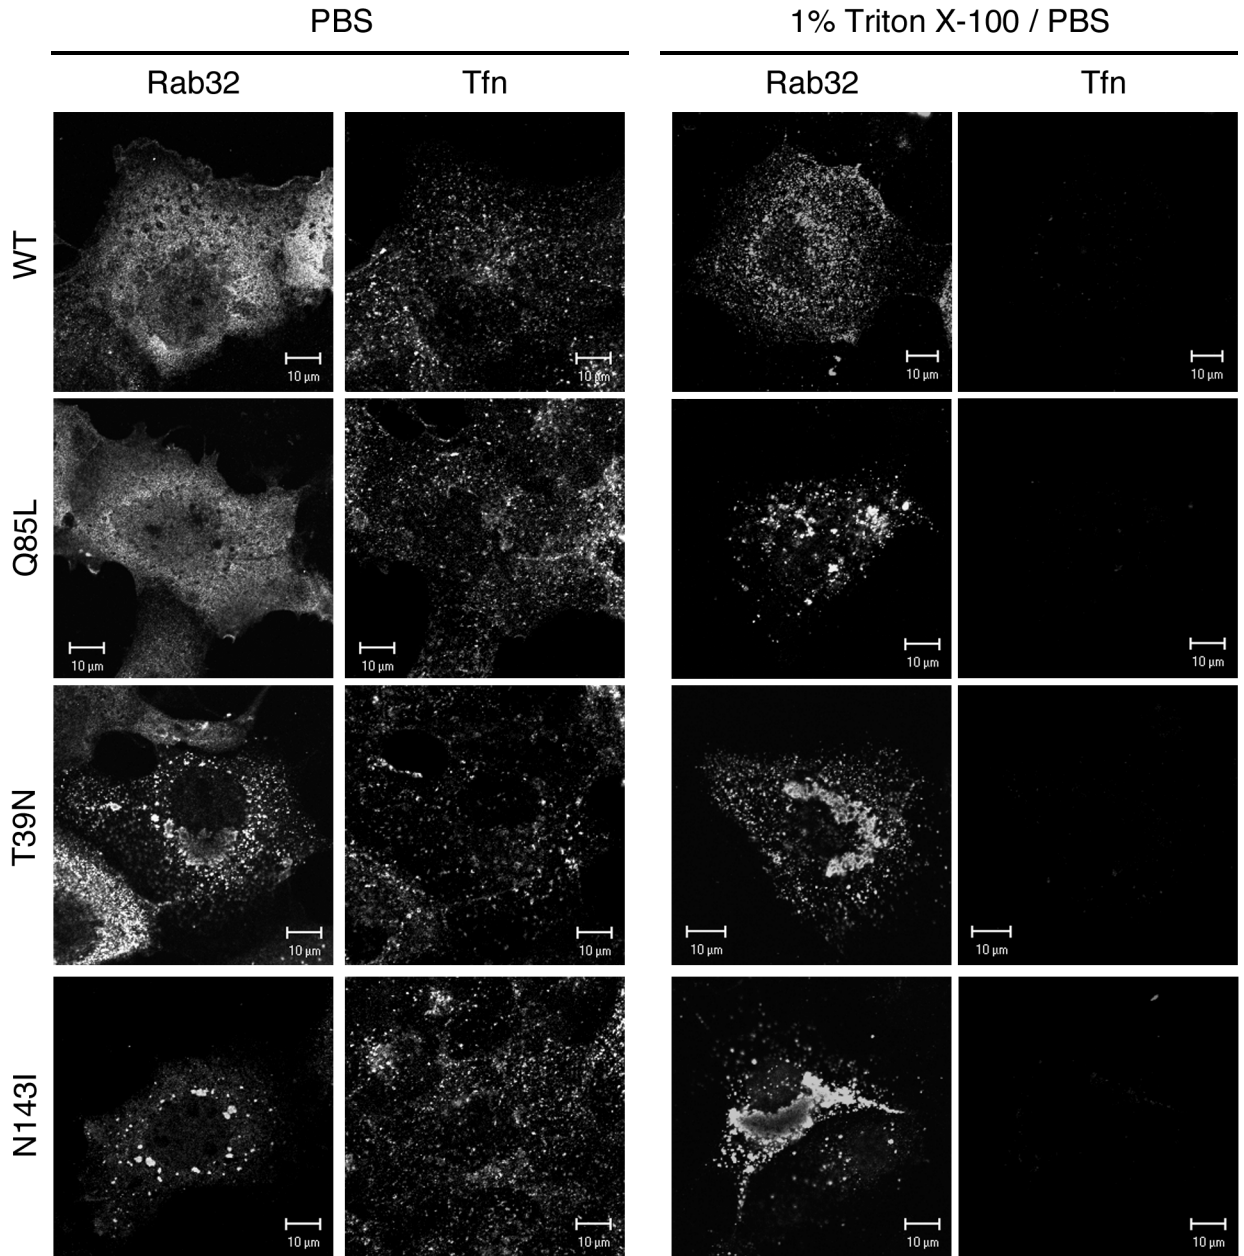

Supplemental Figure 5F Hirota et al.

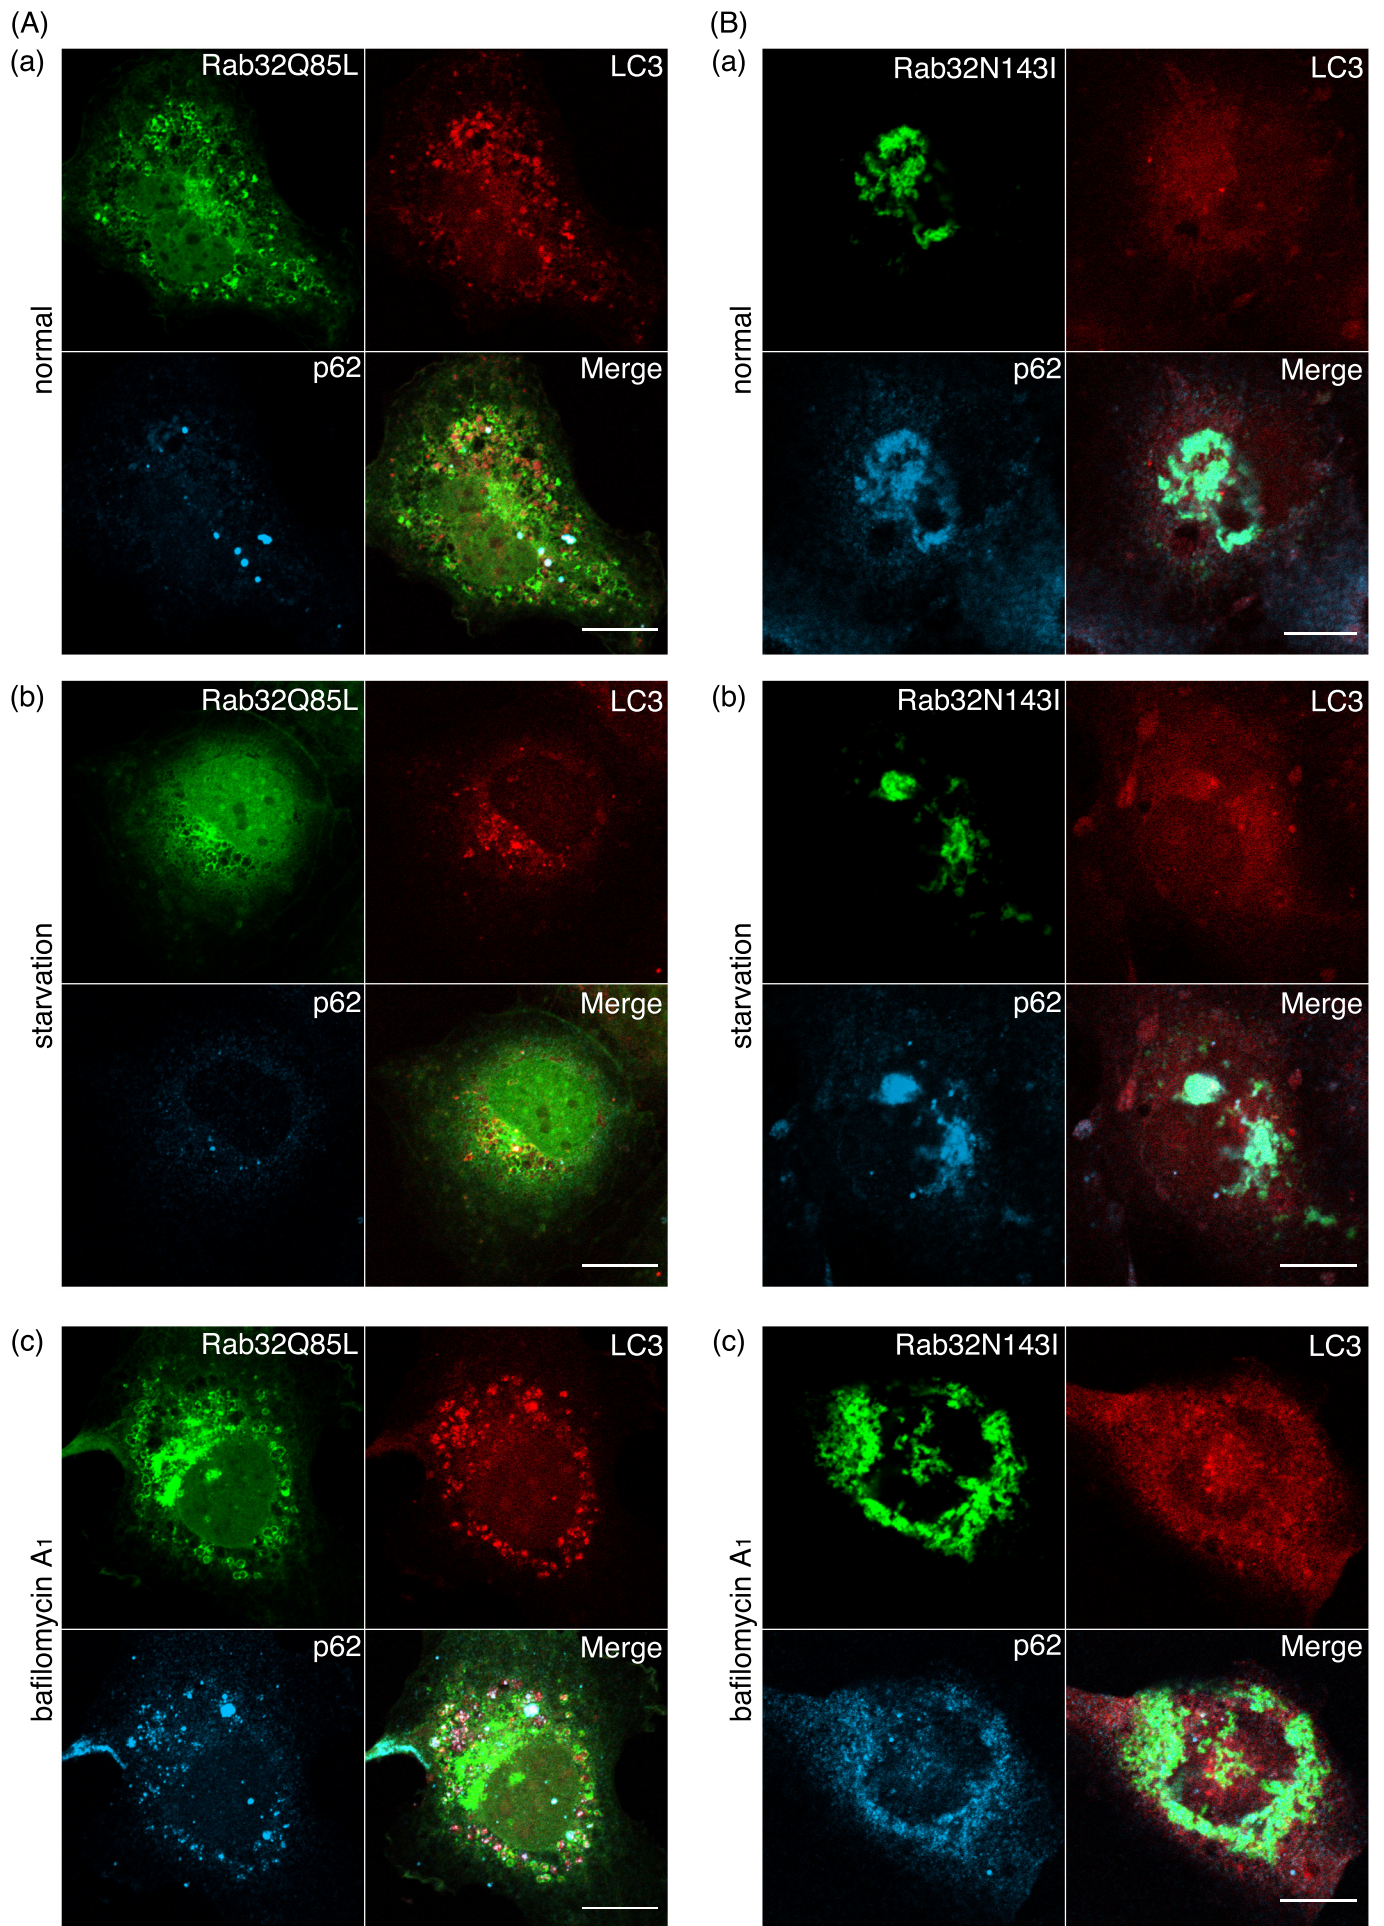

Supplemental Figure 6 Hirota et al.

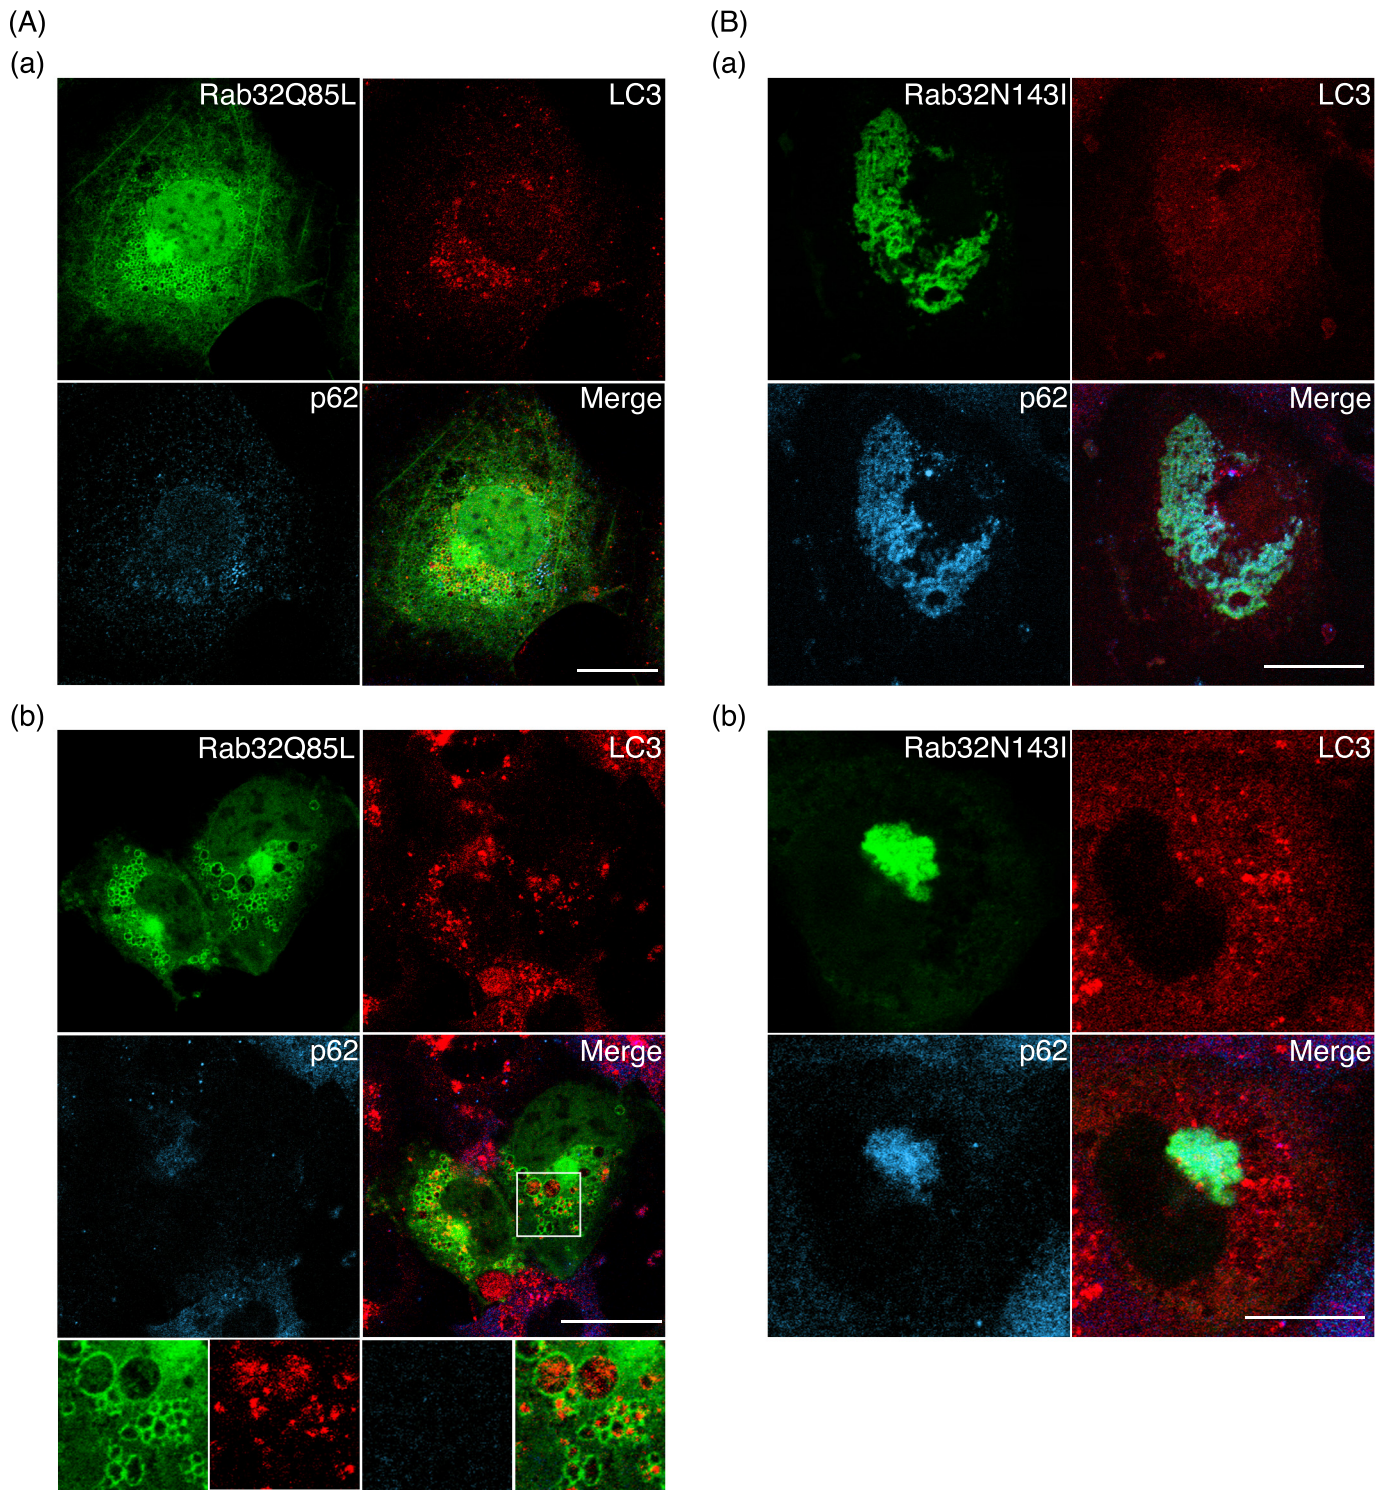

Supplemental Figure 7 Hirota et al.



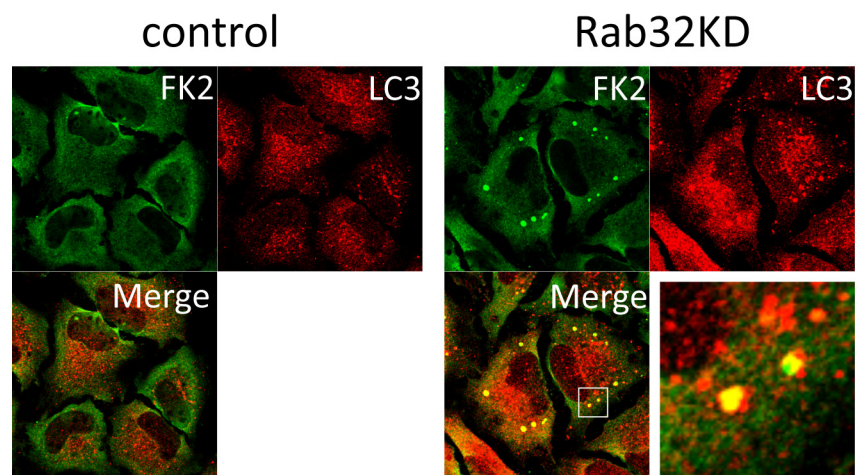

Supplement: 18_2009_80_MOESM2_ESM.pdf [file 18_2009_80_MOESM2_ESM.pdf]
